# Supplementary material for: A naphthalimide-based novel “Turn-On” fluorescence approach for the determination of uric acid and monitoring of xanthine oxidase activity
Source: Royal Society of Chemistry journal article supplement (doi:10.1039/c9ay01464k), 2019-01-01
Supplement: c9ay01464k1.pdf [file c9ay01464k1.pdf]

## Supporting Information

### **A Naphthalimide Based Novel “Turn-On” Fluorescence Approach for Uric Acid Determination and Monitoring of Xanthine Oxidase Activity**

Jagpreet Singh Sidhu<sup>†</sup>, Shilpa Sharma<sup>†</sup>, Ashutosh Singh<sup>††</sup>, Neha Garg<sup>††</sup>, Navneet Kaur<sup>§\*</sup>,  
Narinder Singh<sup>†\*</sup>

<sup>†</sup> Department of Chemistry, Indian Institute of Technology Ropar, Rupnagar, Punjab 140001,  
India

<sup>††</sup> School of Basic Sciences, Indian Institute of Technology Mandi, Kamand, Mandi, Himachal  
Pradesh, 175005, India

<sup>§</sup>Department of Chemistry, Panjab University Chandigarh, 160014

Corresponding Author: [nsingh@iitrpr.ac.in](mailto:nsingh@iitrpr.ac.in)

[navneetkaur@pu.ac.in](mailto:navneetkaur@pu.ac.in)

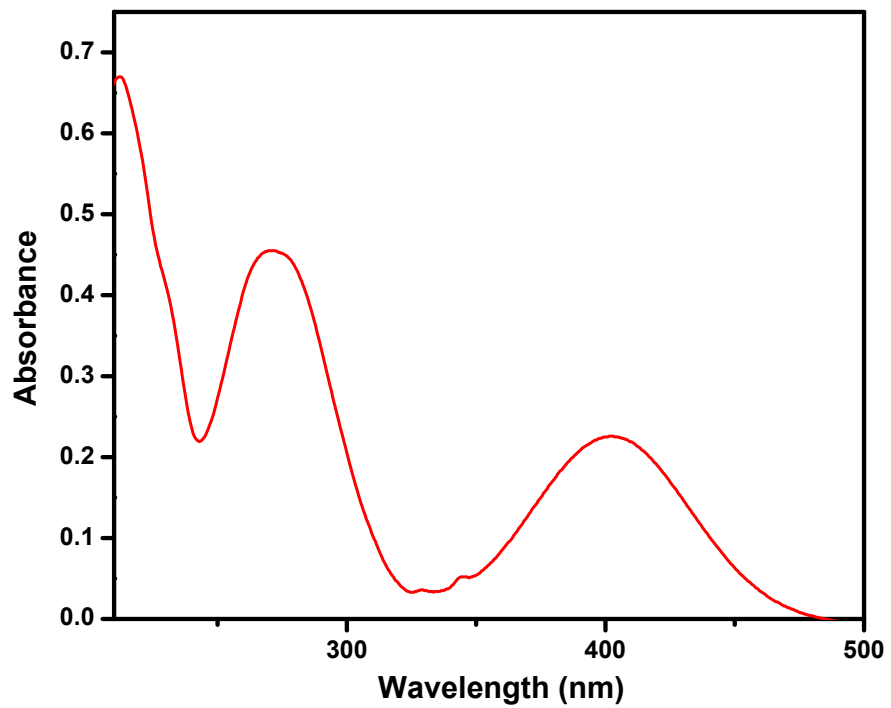

**Fig. S1:** Uv-Vis absorption spectra of S3.

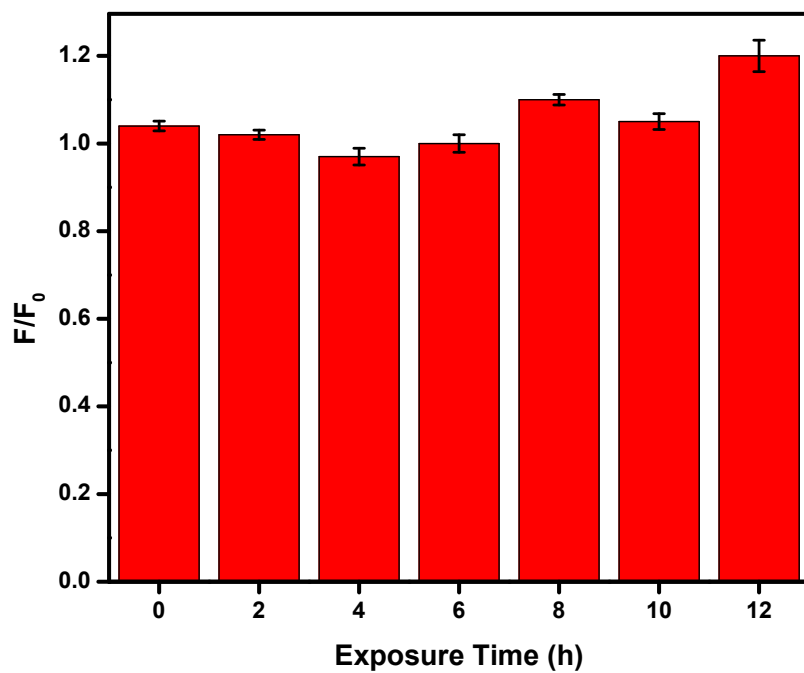

**Fig. S2:** Fluorescence stability study of S3 after exposing to UV light at different time interval.

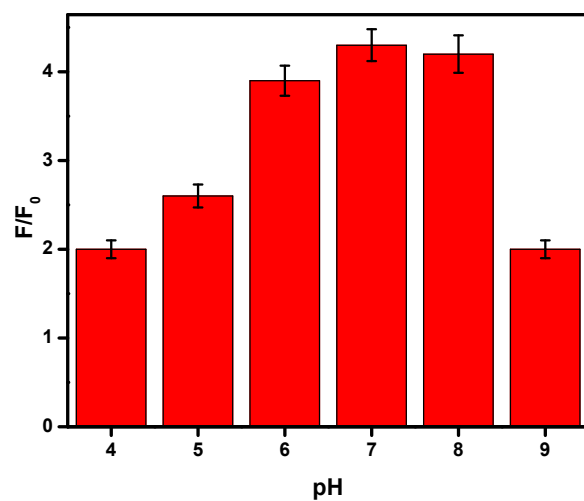

**Fig. S3:** Effect of pH over fluorescence emission of S3 in the presence of uric acid

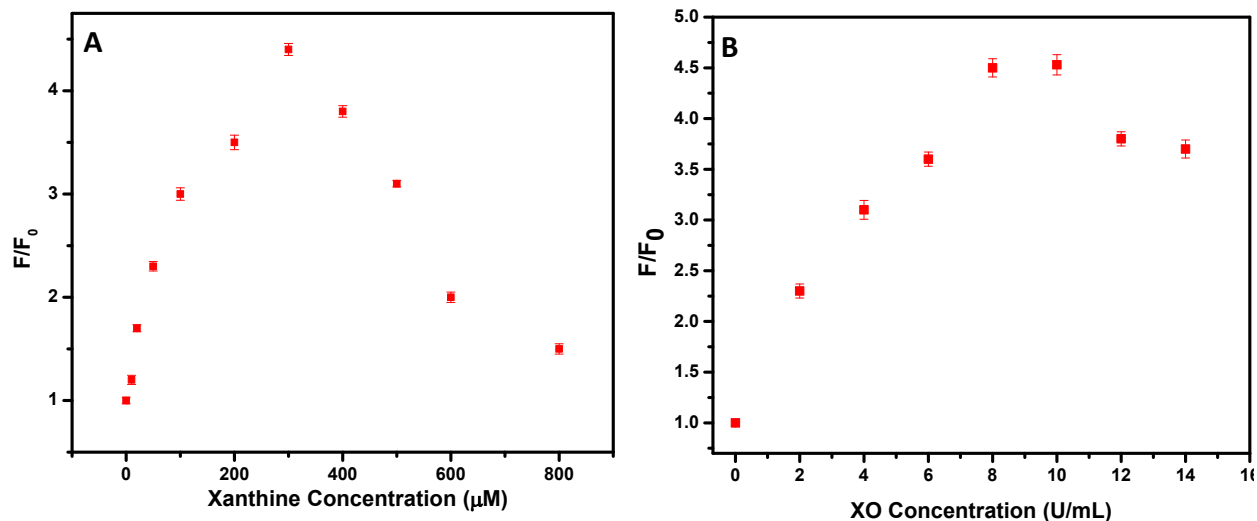

**Fig. S4:** (A) Change in the fluorescence emission of probe **S3** when different concentration of xanthine was added to probe solution. The concentration of enzyme remained fixed 15 U/mL with incubation time is 25 min. (B) Change in fluorescence emission of probe at different concentration of XO while the concentration of xanthine remained 300  $\mu\text{M}$  constant.

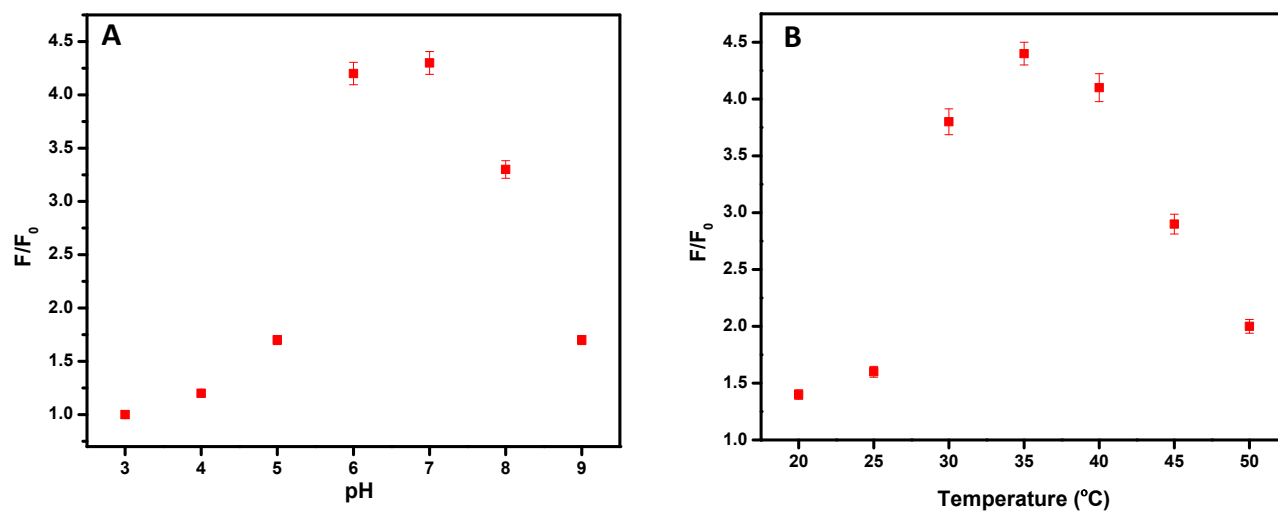

**Fig. S5:** (A) pH dependent fluorescence emission response of probe **S3** in the presence of xanthine and XO. (B) Temperature dependent fluorescence emission response of probe **S3** in the presence of Xanthine and XO (15 U/mL).

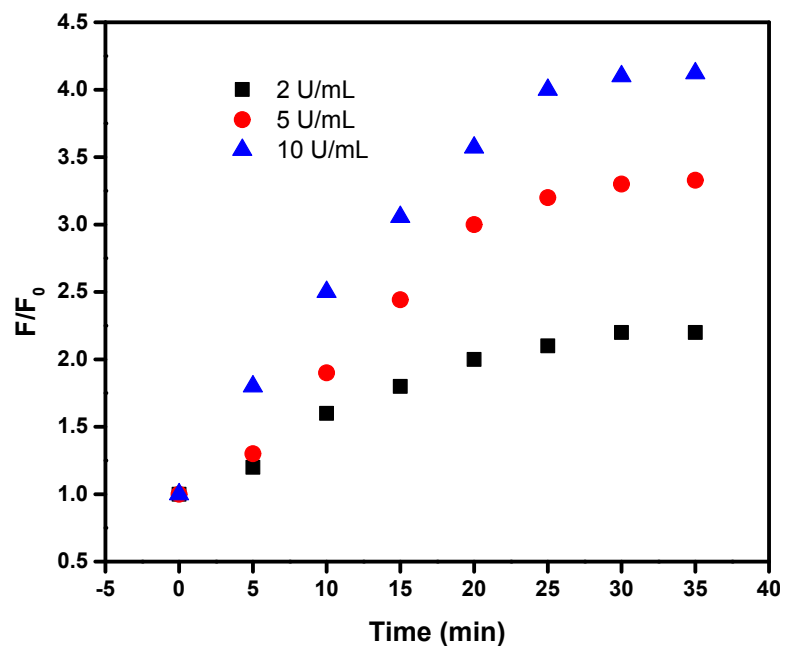

**Fig. S6:** Time dependent change in fluorescence emission of probe **S3** in response to enzymatic action. Where black, red and blue colour represents the addition of 2, 5 and 10 U/mL of XO.

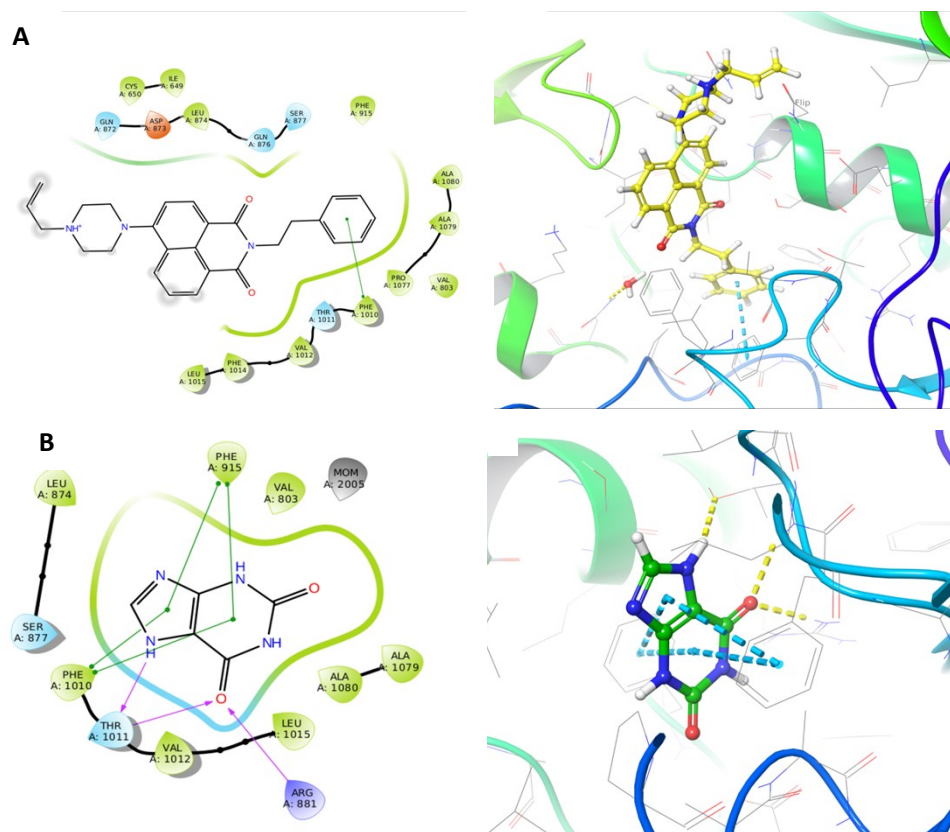

**Fig. S7:** Molecular docking study of xanthine and probe **S3** (A) Docking pose probe **S3** with XO (B) Docking pose of xanthine with XO.

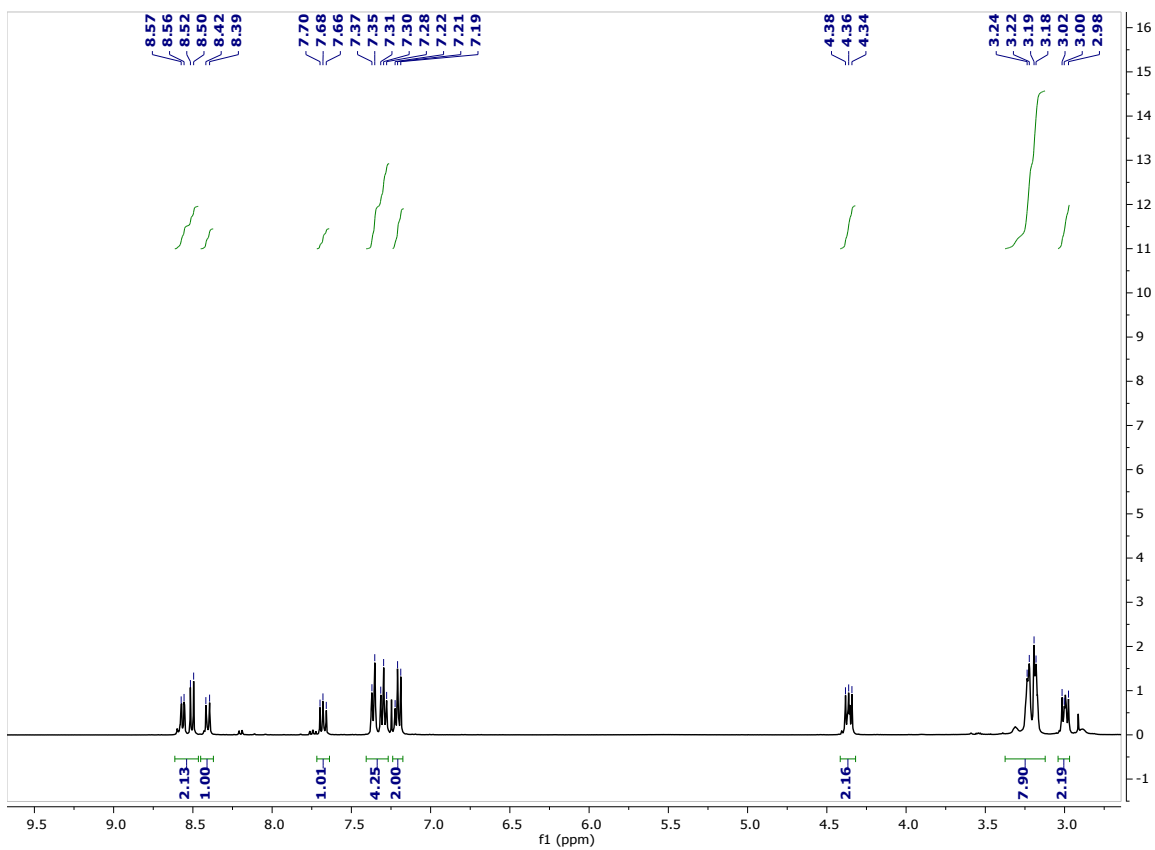

**Fig. S8: <sup>1</sup>H NMR of S2**

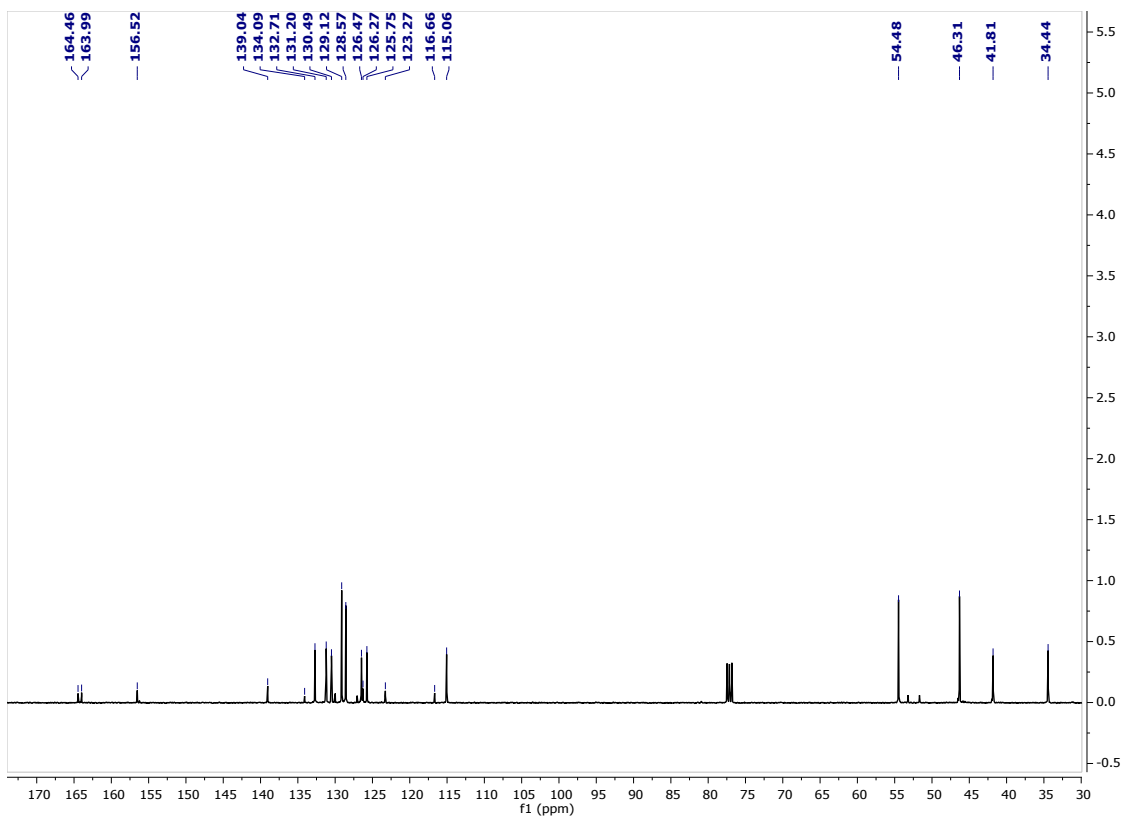

**Fig. S9:**  $^{13}\text{C}$ NMR of S2

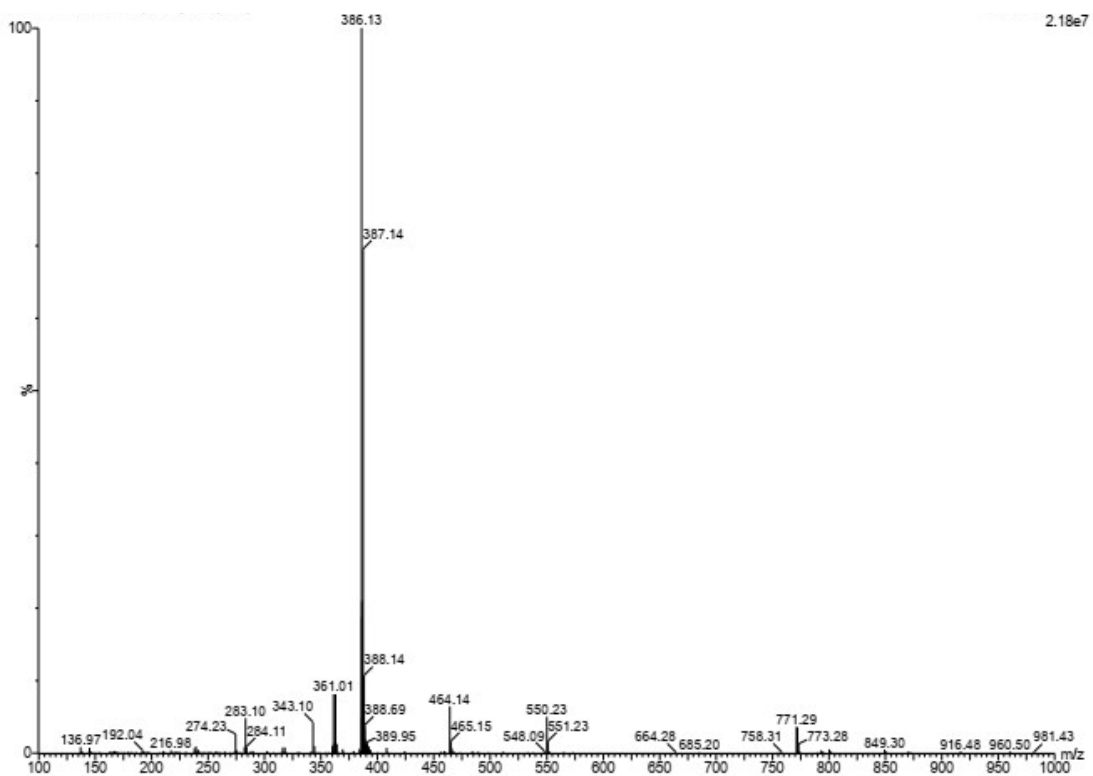

**Fig. S10:** MS data of S2

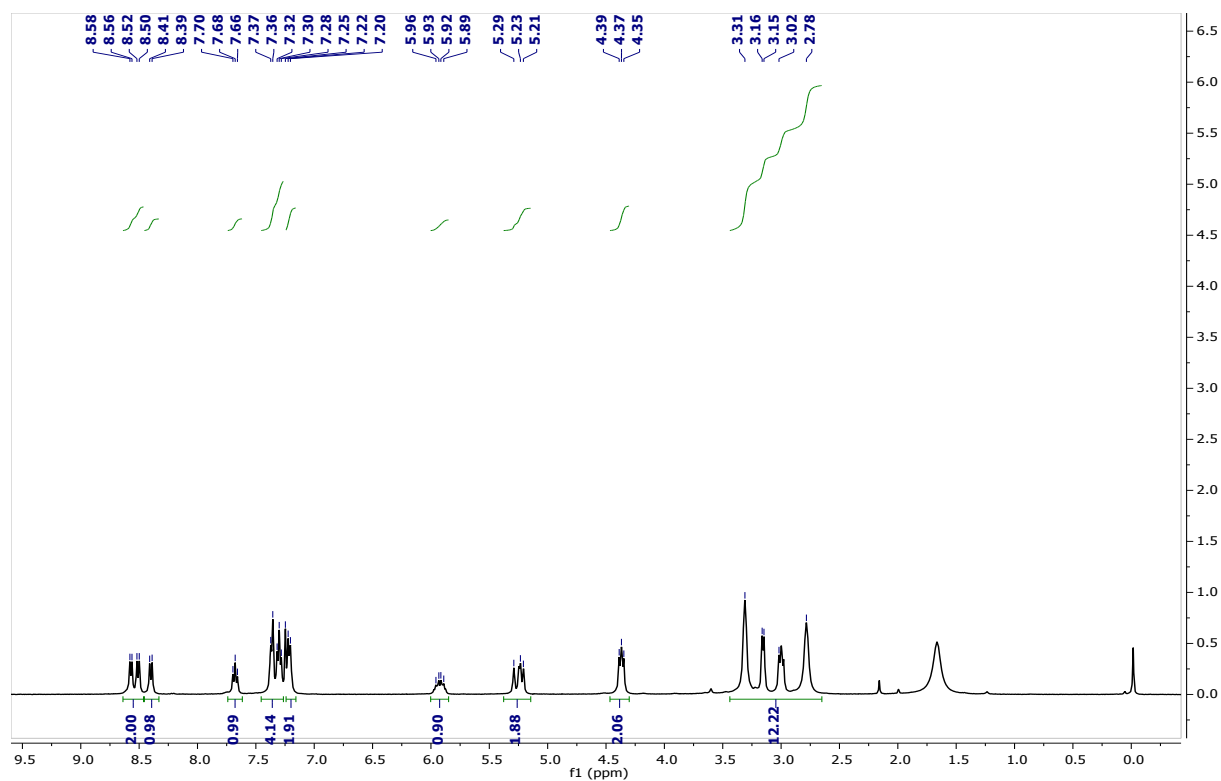

**Fig. S11:**  $^1\text{H}$ NMR of S3

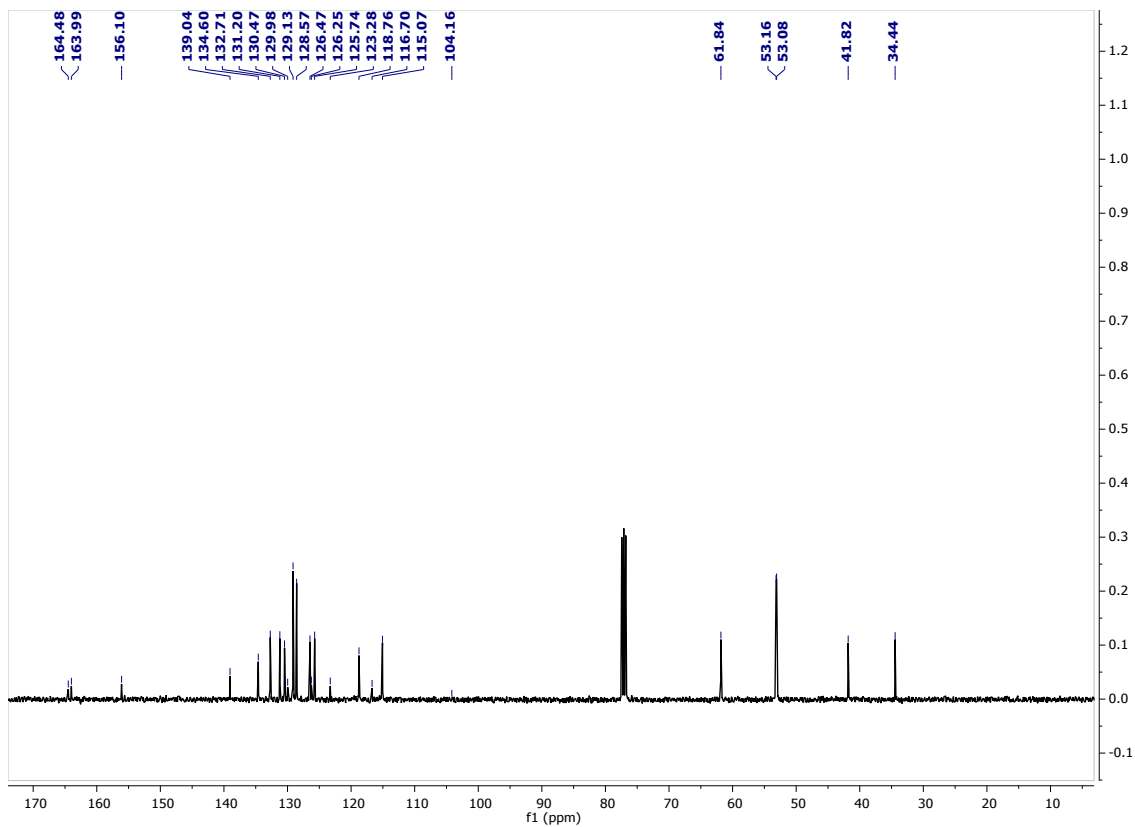

Fig. S12:  $^{13}\text{C}$ NMR of S3

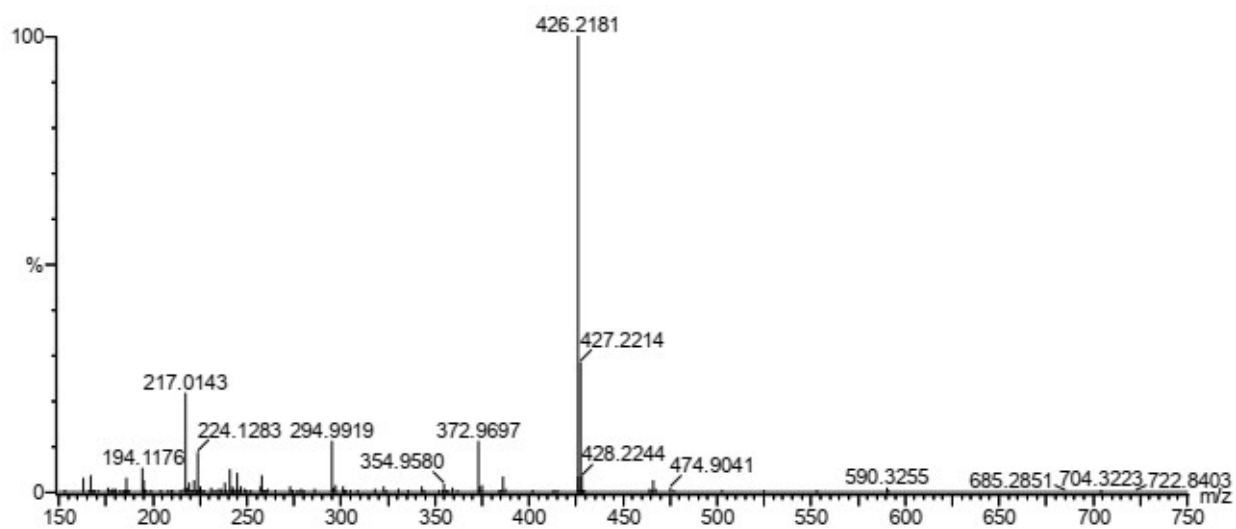

| Mass     | Calc. Mass | mDa  | PPM  | DBE  | i-FIT | Norm | Conf(%) | Formula                                                       |
|----------|------------|------|------|------|-------|------|---------|---------------------------------------------------------------|
| 426.2181 | 426.2182   | -0.1 | -0.2 | 15.5 | 541.1 | n/a  | n/a     | C <sub>27</sub> H <sub>28</sub> N <sub>3</sub> O <sub>2</sub> |

Minimum: -1.5  
Maximum: 5.0 10.0 50.0

Fig. S13: HRMS data of S3
